# Supplementary material
Source: PubMed Central journal article supplement (PMC3030225)
Supplement: supp_WNL.0b013e318204a397_Figure_e-1.pdf [file supp_WNL.0b013e318204a397_Figure_e-1.pdf]

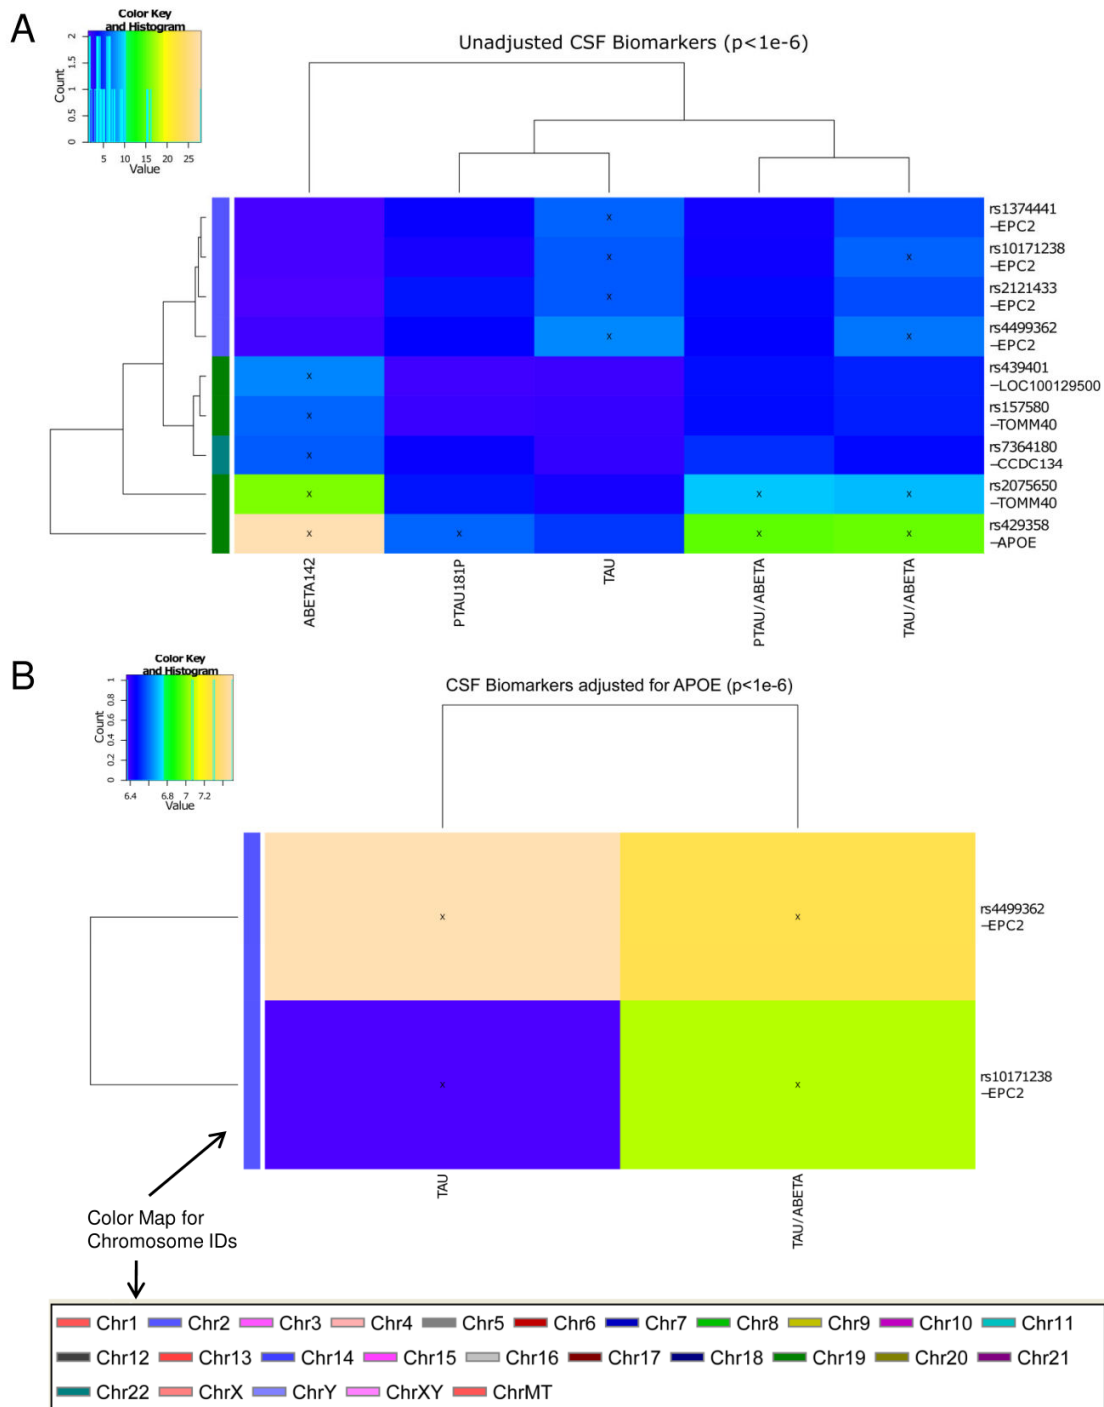

Figure e-1. Heat maps of SNP association with CSF biomarkers at the significance level of  $p < 10^{-6}$ . Significant associations (uncorrected  $p < 10^{-6}$ ) were highlighted by an “x” marker.
