# Supplementary material
Source: PubMed Central journal article supplement (PMC3030225)
Supplement: supp_WNL.0b013e318204a397_Table_e-1.pdf [file supp_WNL.0b013e318204a397_Table_e-1.pdf]

Table e-1. SNPs with uncorrected  $p$  values between  $10^{-5}$  and  $10^{-6}$ . Position is based on Genome Build 36.3.

| SNP        | Chr | Position  | Closest RefSeq Gene | Gene Name                                            | Location relative to gene |
|------------|-----|-----------|---------------------|------------------------------------------------------|---------------------------|
| rs10191411 | 2   | 149104438 | <i>EPC2</i>         | enhancer of polycomb homolog 2                       | 14.6kb upstream           |
| rs6759083  | 2   | 149154681 | <i>EPC2</i>         |                                                      | Intron                    |
| rs7564433  | 2   | 149163108 | <i>EPC2</i>         |                                                      | Intron                    |
| rs10197267 | 2   | 149203379 | <i>EPC2</i>         |                                                      | Intron                    |
| rs11724427 | 4   | 89322196  | <i>ABCG2</i>        | ATP-binding cassette, sub-family G (WHITE), member 2 | 23.2kb upstream           |
| rs2583693  | 8   | 20710259  | <i>LOC724059</i>    |                                                      | 124.1kb downstream        |
| rs10974334 | 9   | 4092339   | <i>GLIS3</i>        | GLIS family                                          | Intron                    |
| rs2208558  | 9   | 4093345   | <i>GLIS3</i>        | zinc finger 3                                        | Intron                    |
| rs17157052 | 10  | 1853551   | <i>LOC100129465</i> |                                                      | 48.0kb upstream           |
| rs7123160  | 11  | 79796236  | <i>LOC729790</i>    |                                                      | 245.9kb downstream        |
| rs2448281  | 11  | 79803240  | <i>LOC729790</i>    |                                                      | 238.9kb downstream        |
| rs1408888  | 13  | 71326648  | <i>DACHI</i>        | dachshund                                            | Intron                    |

|            |    |          |               |                                                                           |                  |
|------------|----|----------|---------------|---------------------------------------------------------------------------|------------------|
|            |    |          |               | homolog 1                                                                 |                  |
| rs11628929 | 14 | 23913894 | <i>NFATC4</i> | nuclear factor of activated T-cells, cytoplasmic, calcineurin-dependent 4 | Intron           |
| rs6573766  | 14 | 23921886 | <i>NFATC4</i> |                                                                           | 3.2kb downstream |
| rs3936367  | 16 | 81106786 | <i>CDH13</i>  | cadherin 13, H-cadherin (heart)                                           | 111.3kb upstream |
| rs3813089  | 18 | 46600022 | <i>MRO</i>    | maestro                                                                   | Exon             |
| rs1885082  | 20 | 17541984 | <i>RRBP1</i>  | ribosome binding protein 1 homolog 180kDa                                 | 0.3kb downstream |
| rs6089510  | 20 | 59810819 | <i>CDH4</i>   | cadherin 4, type 1, R-cadherin (retinal)                                  | Intron           |
| rs4444     | 22 | 29535334 | <i>OSBP2</i>  | oxysterol binding protein 2                                               | Intron           |
| rs136245   | 22 | 29538544 | <i>OSBP2</i>  |                                                                           | Intron           |
| rs136243   | 22 | 29539135 | <i>OSBP2</i>  |                                                                           | Intron           |
| rs2269657  | 22 | 40594215 | <i>SREBF2</i> | sterol regulatory element binding transcription factor 2                  | Intron           |
